# Supplementary material
Source: PubMed Central journal article supplement (PMC6741616)
Supplement: jin-0006-0293-s01.pdf [file jin-0006-0293-s01.pdf]

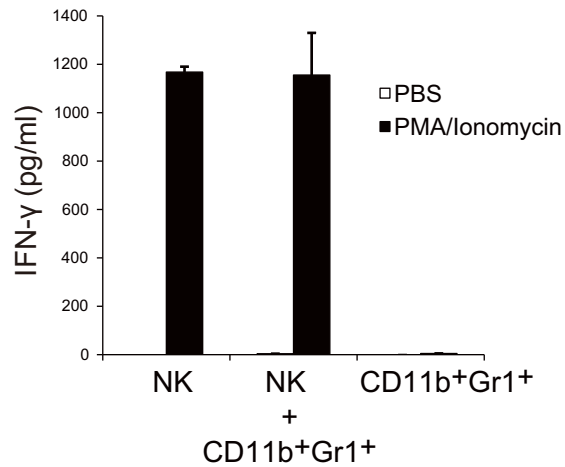

**Supplementary Fig. 1.** CD11b<sup>+</sup>Gr1<sup>+</sup> cells of B16 tumor-bearing mice do not inhibit IFN- $\gamma$  production by NK cells. NK cells ( $2 \times 10^5$ ) from naïve WT mice were co-cultured with or without CD11b<sup>+</sup>Gr1<sup>+</sup> cells ( $2 \times 10^5$ ) from spleen of B16 tumor-bearing mice. Cells were incubated with 50 ng/ml PMA and 2  $\mu$ g/ml ionomycin for 24 hours. IFN- $\gamma$  concentration in conditioned medium was determined.

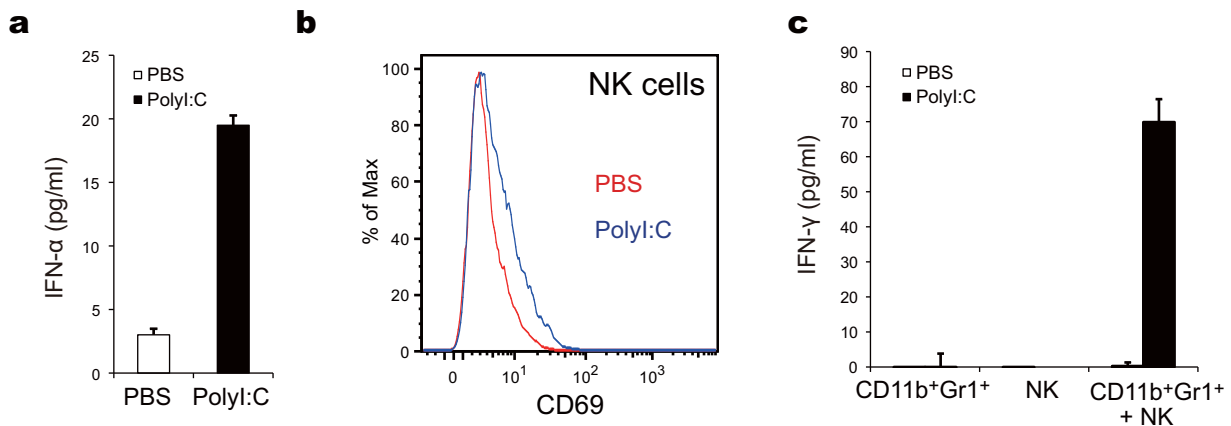

**Supplementary Fig. 2.** CD11b<sup>+</sup>Gr1<sup>+</sup> cells of EL4 tumor-bearing mice activate NK cells after polyI:C. EL4 thymoma cells ( $1 \times 10^6$ ) were implanted sc into B6 WT mice. After tumor formation, 200  $\mu$ g polyI:C or PBS was injected i.p., CD11b<sup>+</sup>Gr1<sup>+</sup> cells were isolated from spleen and co-cultured with naïve NK cells. IFN- $\alpha$  production from CD11b<sup>+</sup>Gr1<sup>+</sup> cells, and NK cell CD69 expression and IFN- $\gamma$  production was determined.

### B16 cells

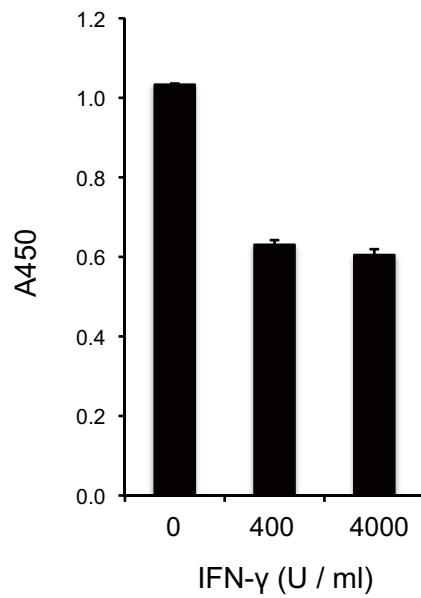

**Supplementary Fig. 3.** Inhibition of B16 cell proliferation by IFN-γ. B16D8 cells were seeded at  $2 \times 10^4$  cells / 100  $\mu$ l in 96-well microplate and cultured for 24 hours in the presence of varying amounts of recombinant mouse IFN-γ (Biolegend). Cell proliferation was determined by standard XTT assay.

**a**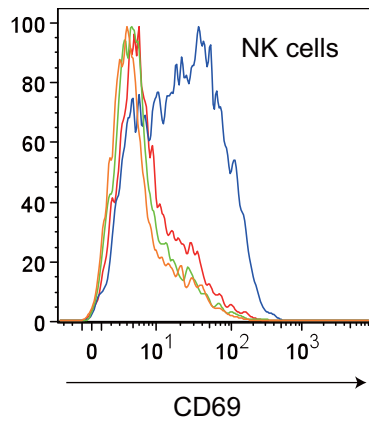

PBS, transwell -

PBS, transwell +

PolyI:C, transwell -

PolyI:C, transwell +

**b**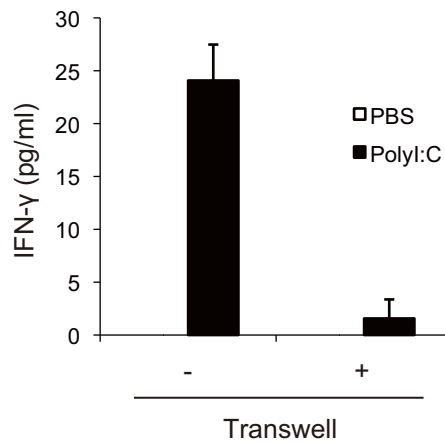

+

**Supplementary Fig. 4.** Abrogation of NK cell activation by CD11b<sup>+</sup>Gr1<sup>+</sup> cells in a transwell system.

CD11b<sup>+</sup>Gr1<sup>+</sup> cells were isolated from B16 tumor-bearing mice treated with polyI:C or PBS. A 0.4 μm transwell was inserted between CD11b<sup>+</sup>Gr1<sup>+</sup> cells (2x10<sup>5</sup>) and NK cells (2x10<sup>5</sup>). CD69 expression on NK1.1<sup>+</sup>CD3ε<sup>-</sup> (**a**) and IFN-γ concentration in conditioned medium (**b**) was determined after the culturing for 24 hours.
